# Supplementary material
Source: PubMed Central journal article supplement (PMC7035112)

Fig. 1b

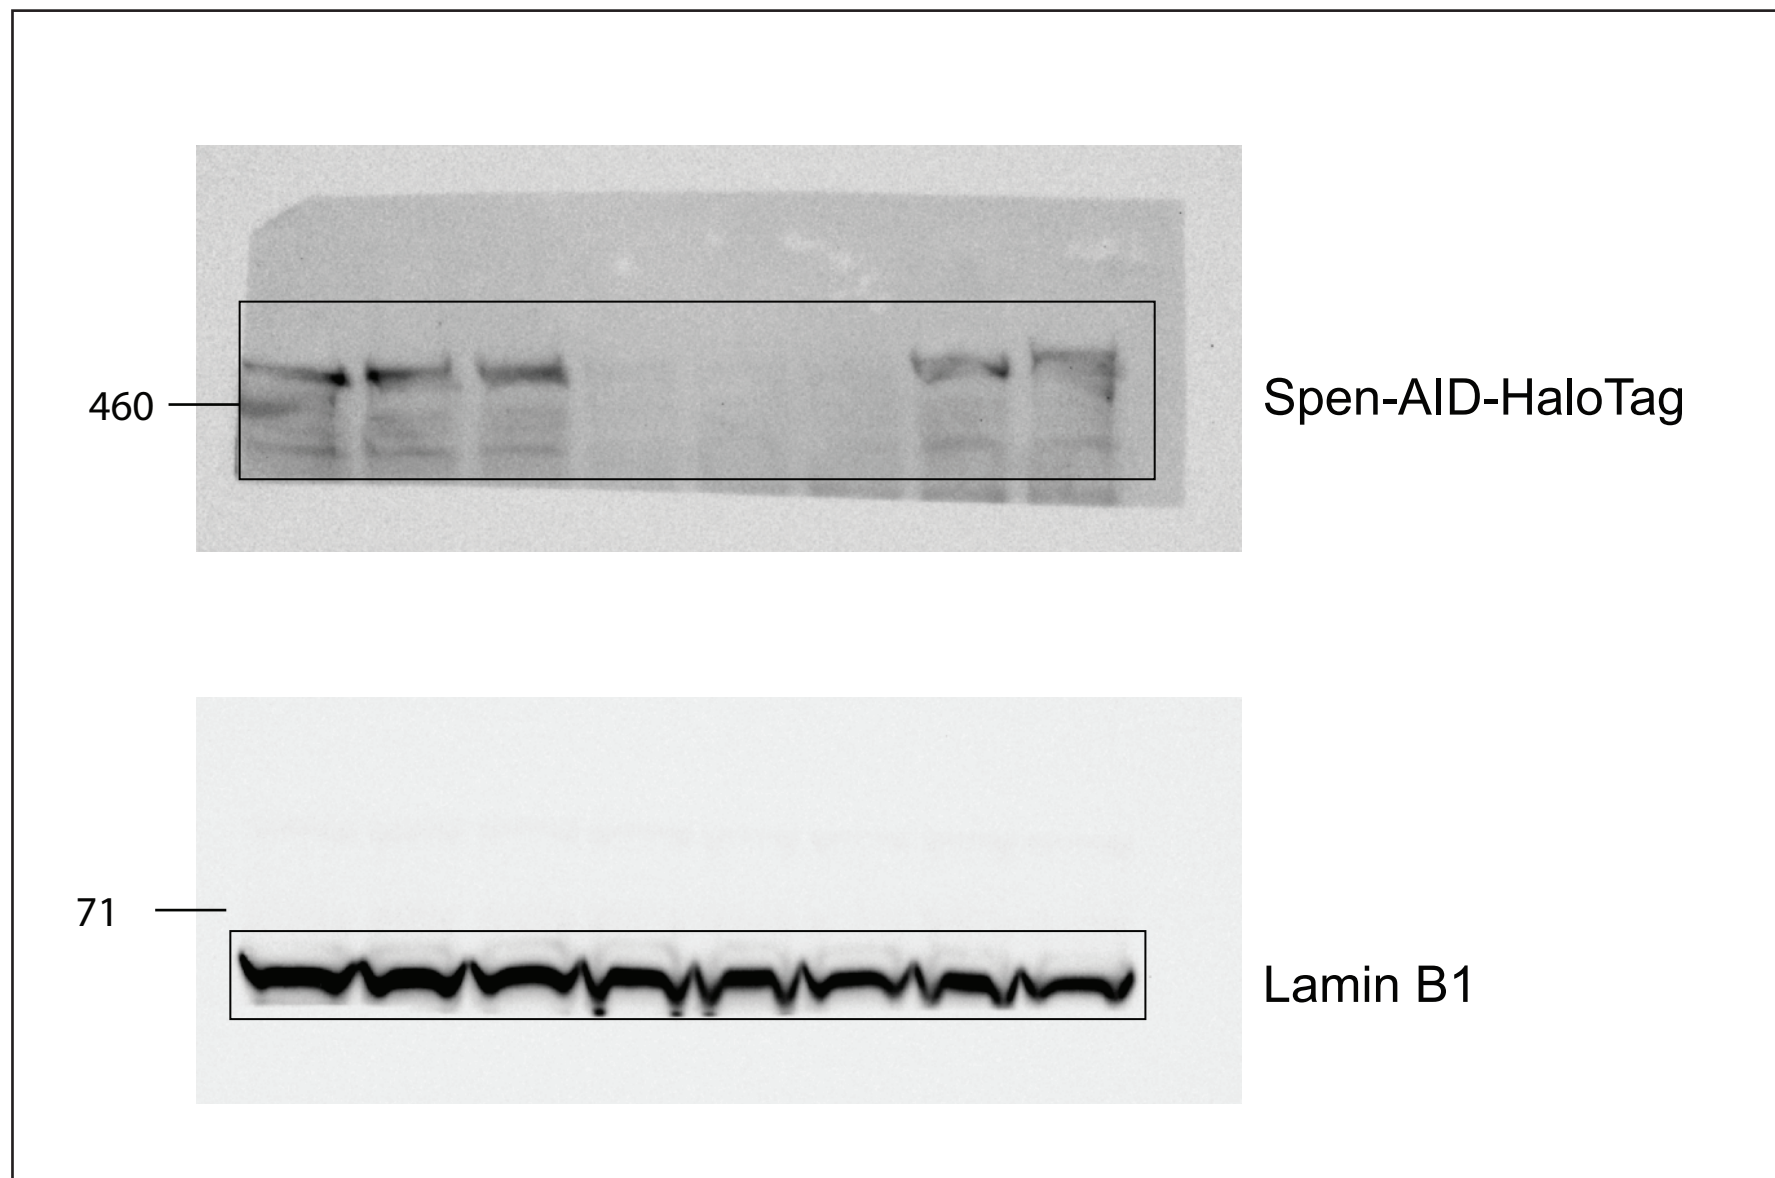

Fig. 3h

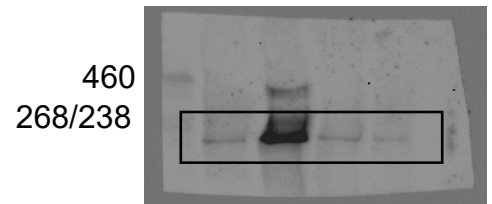

Pol2 (8WG16)

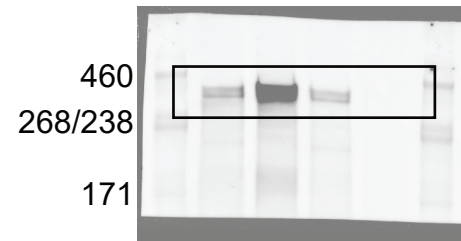

aNcor2 (ab5802)

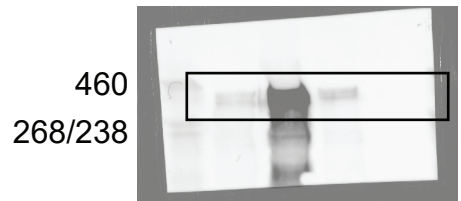

aNcor1 (ab3482)

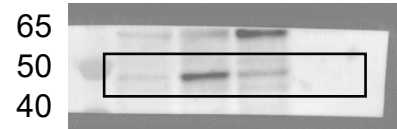

aHdac3 (SantaCruz)

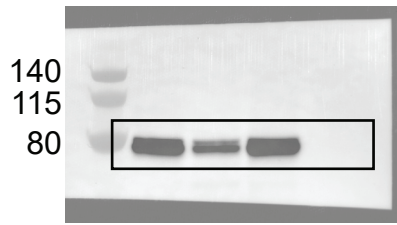

aMta1 (CST)

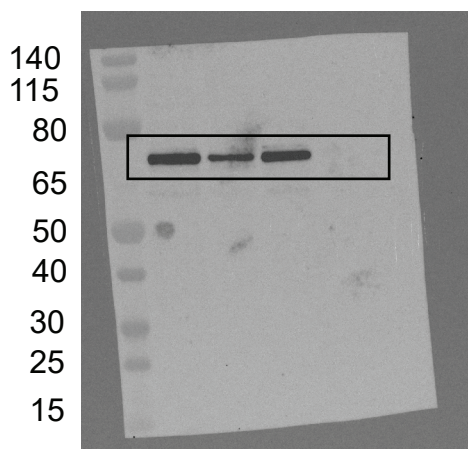

aMettl3 (Abcam)

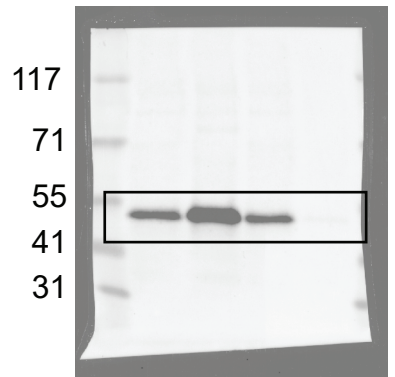

aWtap (Proteintech)

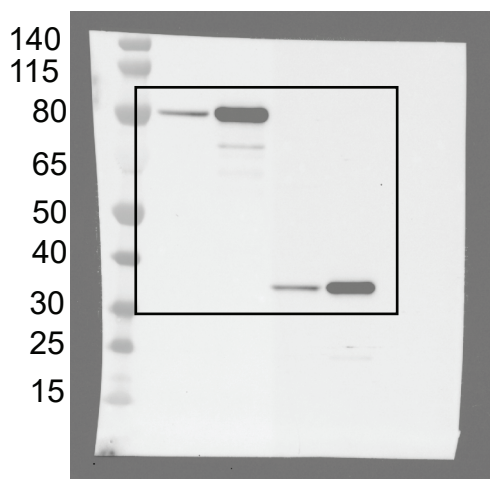

BgIG-GFP-Spoc

BgIG-GFP

aGFP (Roche)

Extended Data Fig. 3b

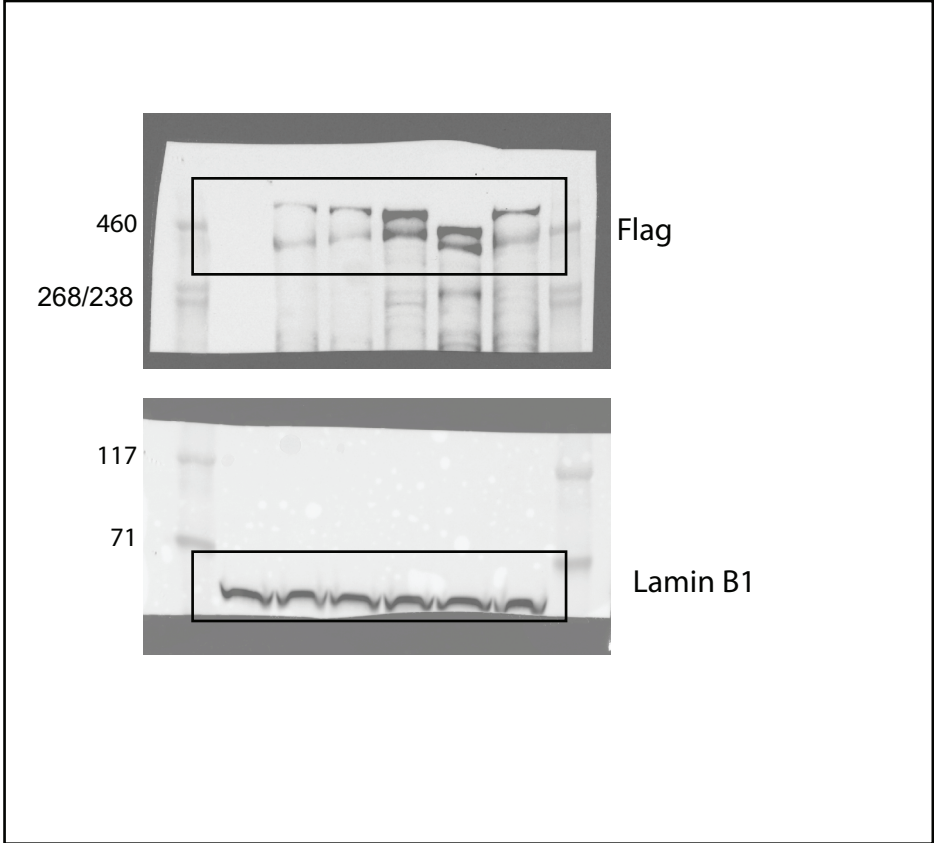

Supplement: EMS85429-supplement-Supplementary_Figure_1.pdf [file EMS85429-supplement-Supplementary_Figure_1.pdf]
